# Supplementary material for: Domain-Specific Cognitive Prosthesis for Face Memory and Recognition
Source: Diagnostics (Basel). 2022 Sep 16;12(9):2242. doi: 10.3390/diagnostics12092242 (PMC9497523; doi:10.3390/diagnostics12092242)
Supplement: Supplementary file 1 [file diagnostics-12-02242-s001.zip › diagnostics-1852639-supplementary.pdf]

**Supplementary Table S1.** Task analysis of cognitive prosthesis device.

| Task                                            | Use error | Total Time | Task analysis                                                                   |
|-------------------------------------------------|-----------|------------|---------------------------------------------------------------------------------|
| 1. Turn on the screen and return to application | 0         | 8.75       | Taking 2 attempts to slide up to exit the lock screen                           |
| 2. Turn off the screen                          | 0         | 2.19       |                                                                                 |
| 3. Face recognition using screen                | 0         | 18.05      | Taking 16 attempts to slide up to exit the lock screen                          |
| 4. Face recognition using speaker               | 0         | 7.33       |                                                                                 |
| 5. Adjusting device volume                      | 0         | 14.09      |                                                                                 |
| 6. Adjusting font size                          | 0         | 43.07      | User randomly tap and slide on screen to find a way to enter the setting screen |
| 7. Recharging the device                        | 0         | 6.72       |                                                                                 |

**Supplementary Table S2.** Real-world cognitive prosthesis algorithm machine learning performance data.

| <b>Metrics</b>            | <b>Baseline</b> | <b>Week 1</b> | <b>Week 2</b> | <b>Week 3</b> | <b>Week 4</b> | <b>Cumulative</b> |
|---------------------------|-----------------|---------------|---------------|---------------|---------------|-------------------|
| Accuracy                  | 0.989           | 0.994         | 0.996         | 0.990         | 0.967         | 0.986±0.013       |
| Error rate                | 0.011           | 0.006         | 0.004         | 0.010         | 0.033         | 0.014±0.013       |
| Specificity               | 0.994           | 0.997         | 0.998         | 0.979         | 0.980         | 0.988±0.010       |
| Precision                 | 0.946           | 0.924         | 0.982         | 0.993         | 0.933         | 0.958±0.035       |
| Recall                    | 0.975           | 0.995         | 0.993         | 0.933         | 0.933         | 0.964±0.035       |
| F1-rate                   | 0.957           | 0.953         | 0.987         | 0.955         | 0.920         | 0.954±0.028       |
| False<br>positive<br>rate | 0.006           | 0.003         | 0.002         | 0.021         | 0.020         | 0.012±0.010       |
| False<br>negative<br>rate | 0.025           | 0.005         | 0.007         | 0.067         | 0.067         | 0.036±0.035       |
